# Supplementary material for: Musashi1 modulates cell proliferation genes in the medulloblastoma cell line Daoy
Source: Springer Nature journal article supplement (doi:10.1186/1471-2407-8-280), 2008-09-30
Supplement: Additional file 1 [file 1471-2407-8-280-s1.pdf]

## 1.1. Table 1. qPCR primers

| <i>Gene</i>         | <i>Forward (5'→3')</i>  | <i>Reverse (5'→3')</i>   |
|---------------------|-------------------------|--------------------------|
| <i>BCL2</i>         | TACCTGAACCGGCACCTG      | GCCGTACAGTTCACAAAGG      |
| <i>BMI1</i>         | TCATCCTTCTGCTGATGCTG    | GCATCACAGTCATTGCTGCT     |
| <i>CCND1</i>        | GAACAAACAGATCATCCGCAAAC | GCGGTAGTAGGACAGGAAGTTG   |
| <i>CCND2</i>        | TGGGGAAGTTGAAGTGAAC     | ATCCACGTCTGTGTTGGTGA     |
| <i>CDKN1A</i> (p21) | GGAAGACCATGTGGACCTGT    | GGATTAGGGCTTCCTCTTGG     |
| <i>DKK1</i>         | TCGGTTCTCAATTCCAACGCT   | GGGTACGGCTGGTAGTTGT      |
| <i>FOS</i>          | CGGGCTTCAACGCAGACTA     | GGTCCGTGCAGAAGTCTCG      |
| <i>GADD45A</i>      | CCCTGATCCAGGCGTTTTG     | GATCCATGTAGCGACTTTCCC    |
| <i>GAPDH</i>        | CCCCTGGCCAAGGTCATCCA    | ACAGCCTTGGCAGCGCCAGT     |
| <i>GLI1</i>         | ACCCGGGGTCTCAAACCTG     | GGCTGACAGTATAGGCAGAGC    |
| <i>HES1</i>         | CTCTCTTCCCTCCGGACTCT    | AGGCGCAATCCAATATGAAC     |
| <i>HES5</i>         | GCCCCGGGTTCTATGATATT    | GAGTTCGGCCTTCACAAAAG     |
| <i>HEY2</i>         | GGCGTCGGGATCGGATAAATA   | AAGTAGCCTTTACCCCCTGTT    |
| <i>MSI1</i>         | GAGGGTTCGGGTTTGTACAG    | GGCGACATCACCTCCTTTGG     |
| <i>MYCN</i>         | CCCTGAGCGATTGATGATGAT   | GACGCACAGTATGGTGAAT      |
| <i>NOTCH1</i>       | CCGCAGTTGTGCTCCTGAA     | ACCTTGGCGGTCTCGTAGCT     |
| <i>NOTCH2</i>       | ATGCTCAGCCGGGATACCT     | GGTTGGCCACAGTGGTACAGG    |
| <i>NUMB</i>         | AGCCAGCCCATACTGCTCTA    | CGGACGCTCTTAGACACCTC     |
| <i>PDGFRA</i>       | GAAGCTGTCAACCTGCATGA    | CTTCCTTAGCACGGATCAGC     |
| <i>PPAP2B</i>       | CGCTCAACAACAACCCGAG     | ACCAGTTTTTTCAGTGGGTACTTG |
| <i>PTCH1</i>        | GACCGGGACTATCTGCA       | GTCTGTATCATGAGTTGAGG     |
| <i>RP15S</i>        | TTCCGCAAGTTCACCTACC     | CGGGCCGGCCATGCTTTACG     |
| <i>SMO</i>          | AGGCTGCACGAATGAGGTG     | ACGTCTCGTACCAGCTCTT      |
| <i>VEGF</i>         | CAACATCACCATGCAGATTATGC | GCTTTCGTTTTTGGCCCTTTC    |
| <i>WNT5B</i>        | GGGGACAACGTGGAGTACGG    | AGCTGCAGCCAGCAGGTCTT     |

## 1.2. Msi1 knockdown generation

S1.a

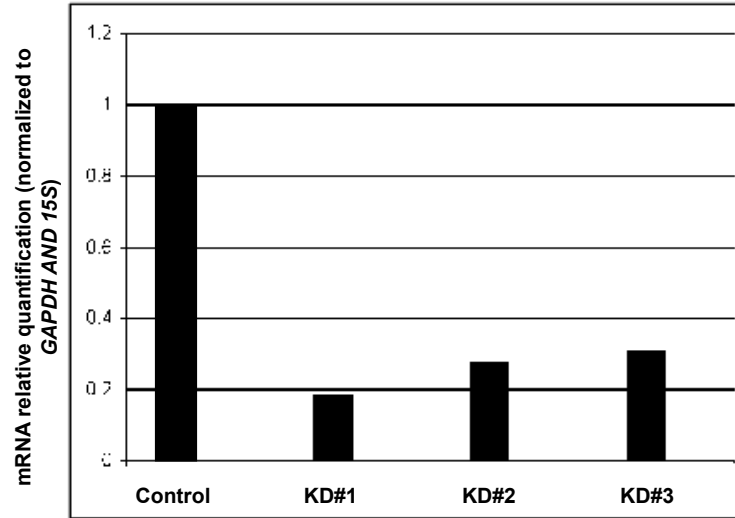

S1.b

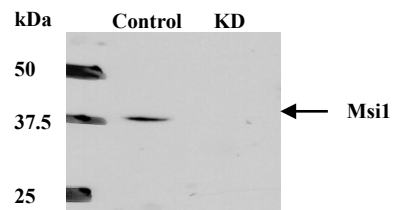

Additional file 1.

1.1. Table 1. qRT-PCR primers. The sequences of the primers utilized in this study are shown in the table.

1.2. Generation of a Msi1 knockdown in Daoy. Msi1 was stably knocked down in Daoy cell line using shRNA. S1.a) Three clones with at least 70% knockdown at mRNA level were selected.

S1.b) Msi1 protein levels were assessed by western blot.
